# Supplementary material for: The effectiveness of case management interventions for the homeless, vulnerably housed and persons with lived experience: A systematic review
Source: PLOS journal article supplement (doi:10.1371/journal.pone.0230896), 2020-04-09
Supplement: S5 (10.1371/journal.pone.0230896.s005) [file journal.pone.0230896.s005]

|                   | Random sequence generation (selection bias) | Allocation concealment (selection bias) | Blinding of participants and personnel (performance bias) | Blinding of outcome assessment (detection bias) | Incomplete outcome data (attrition bias) | Selective reporting (reporting bias) | Other bias |
|-------------------|---------------------------------------------|-----------------------------------------|-----------------------------------------------------------|-------------------------------------------------|------------------------------------------|--------------------------------------|------------|
| Conrad 1998       | ?                                           | +                                       | -                                                         | ?                                               | +                                        | +                                    | +          |
| Graham-Jones 2004 | -                                           | -                                       | -                                                         | ?                                               | +                                        | +                                    | -          |
| Hurlburt 1996     | ?                                           | ?                                       | -                                                         | ?                                               | ?                                        | +                                    | +          |
| Lapham 1995       | ?                                           | ?                                       | -                                                         | ?                                               | -                                        | +                                    | -          |
| Nyamathi 2001     | ?                                           | ?                                       | -                                                         | ?                                               | -                                        | +                                    | +          |
| Nyamathi 2016     | +                                           | +                                       | -                                                         | ?                                               | +                                        | -                                    | +          |
| Sosin 1995        | -                                           | -                                       | -                                                         | ?                                               | ?                                        | +                                    | +          |
| Towe 2019         | +                                           | -                                       | -                                                         | +                                               | +                                        | +                                    | +          |
| Upshur 2015       | +                                           | ?                                       | -                                                         | +                                               | ?                                        | +                                    | +          |
| Weinreb 2016      | ?                                           | ?                                       | -                                                         | ?                                               | +                                        | +                                    | +          |

**Risk-of-bias summary: review authors' judgments about each risk-of-bias item for each included SCM study**

|               | Random sequence generation (selection bias) | Allocation concealment (selection bias) | Blinding of participants and personnel (performance bias) | Blinding of outcome assessment (detection bias) | Incomplete outcome data (attrition bias) | Selective reporting (reporting bias) | Other bias |
|---------------|---------------------------------------------|-----------------------------------------|-----------------------------------------------------------|-------------------------------------------------|------------------------------------------|--------------------------------------|------------|
| Clark 2000    | ?                                           | ?                                       | -                                                         | ?                                               | ?                                        | +                                    | +          |
| Essock 1992   | ?                                           | ?                                       | -                                                         | ?                                               | +                                        | +                                    | +          |
| Essock 2006   | +                                           | ?                                       | -                                                         | ?                                               | +                                        | +                                    | +          |
| Fletcher 2008 | ?                                           | ?                                       | -                                                         | ?                                               | -                                        | +                                    | +          |
| Lehman 1997   | ?                                           | ?                                       | -                                                         | ?                                               | -                                        | -                                    | +          |
| Morse 1992    | ?                                           | ?                                       | -                                                         | ?                                               | +                                        | +                                    | +          |
| Morse 1997    | ?                                           | ?                                       | -                                                         | ?                                               | +                                        | +                                    | +          |
| Morse 2006    | ?                                           | ?                                       | -                                                         | ?                                               | +                                        | +                                    | +          |

**Risk-of-bias summary:** review authors' judgments about each risk-of-bias item for each included ACT study

|                | Random sequence generation (selection bias) | Allocation concealment (selection bias) | Blinding of participants and personnel (performance bias) | Blinding of outcome assessment (detection bias) | Incomplete outcome data (attrition bias) | Selective reporting (reporting bias) | Other bias |
|----------------|---------------------------------------------|-----------------------------------------|-----------------------------------------------------------|-------------------------------------------------|------------------------------------------|--------------------------------------|------------|
| Braucht 1995   | +                                           | ?                                       | -                                                         | ?                                               | +                                        | +                                    | +          |
| Burnam 1995    | ?                                           | ?                                       | -                                                         | ?                                               | -                                        | +                                    | +          |
| Cauce 1994     | +                                           | ?                                       | -                                                         | ?                                               | ?                                        | +                                    | +          |
| Clark 2003     | -                                           | -                                       | -                                                         | ?                                               | -                                        | +                                    | +          |
| Cox 1998       | ?                                           | ?                                       | -                                                         | ?                                               | -                                        | +                                    | +          |
| Felton 1995    | -                                           | -                                       | -                                                         | +                                               | +                                        | +                                    | +          |
| Grace 2014     | -                                           | -                                       | -                                                         | ?                                               | -                                        | -                                    | -          |
| Korr 1995      | ?                                           | ?                                       | -                                                         | ?                                               | -                                        | +                                    | +          |
| Malte 2017     | +                                           | +                                       | -                                                         | -                                               | +                                        | +                                    | -          |
| Marshall 1995  | +                                           | ?                                       | -                                                         | ?                                               | ?                                        | +                                    | +          |
| Orwin 1994     | ?                                           | ?                                       | -                                                         | -                                               | -                                        | +                                    | -          |
| Rosenblum 2002 | -                                           | -                                       | -                                                         | ?                                               | -                                        | +                                    | +          |
| Schutt 2009    | ?                                           | ?                                       | -                                                         | ?                                               | ?                                        | ?                                    | ?          |
| Shern 2000     | ?                                           | ?                                       | -                                                         | ?                                               | +                                        | +                                    | +          |
| Shumway 2008   | +                                           | ?                                       | -                                                         | ?                                               | +                                        | +                                    | +          |
| Stahler 1995   | ?                                           | ?                                       | -                                                         | ?                                               | +                                        | +                                    | +          |
| Toro 1997      | ?                                           | +                                       | -                                                         | -                                               | +                                        | +                                    | +          |

**Risk-of-bias summary: review authors' judgments about each risk-of-bias item for each included ICM study**

|             | Random sequence generation (selection bias) | Allocation concealment (selection bias) | Blinding of participants and personnel (performance bias) | Blinding of outcome assessment (detection bias) | Incomplete outcome data (attrition bias) | Selective reporting (reporting bias) | Other bias |
|-------------|---------------------------------------------|-----------------------------------------|-----------------------------------------------------------|-------------------------------------------------|------------------------------------------|--------------------------------------|------------|
| De Vet 2017 | +                                           | +                                       | -                                                         | -                                               | +                                        | +                                    | +          |
| Herman 2011 | +                                           | -                                       | -                                                         | +                                               | +                                        | +                                    | +          |
| Lako 2018   | +                                           | +                                       | -                                                         | ?                                               | +                                        | -                                    | -          |
| Shinn 2015  | ?                                           | ?                                       | -                                                         | +                                               | ?                                        | +                                    | +          |
| Susser 1997 | ?                                           | ?                                       | -                                                         | +                                               | +                                        | +                                    | +          |

**Risk-of-bias summary:** review authors' judgments about each risk-of-bias item for each included CTI study
